# Supplementary material for: A National Cross-Sectional Study of Research Opportunities and Barriers Among Medical Students in Nigeria
Source: Research Square preprint supplement (doi:10.21203/rs.3.rs-6230079/v1), 2025-04-21
Supplement: Supplementary file 1 [file 4225f3909c16420f8e622660.xlsx]

## Sheet: Sheet1
		SEX			INSTITUTION TYPE				REGION
Barriers and Enablers of Research Participation
	Total	Female	Male	p	Federal	State	Private	p	NC	NE	NW	SE	SS	SW	p
Barriers
Time Availability	317 (74%)	104 (65%)	213 (79%)	0.002	165 (75%)	53 (75%)	99 (71%)	0.7	78 (66%)	62 (81%)	45 (85%)	36 (73%)	45 (75%)	51 (71%)	0.1
Access to Funding	238 (55%)	74 (47%)	164 (61%)	0.004	130 (59%)	27 (38%)	81 (58%)	0.005	61 (52%)	51 (66%)	31 (58%)	23 (47%)	40 (67%)	32 (44%)	0.028
Access to Research Skill Training	135 (31%)	61 (38%)	74 (27%)	0.018	78 (36%)	21 (30%)	36 (26%)	0.14	39 (33%)	23 (30%)	13 (25%)	14 (29%)	16 (27%)	30 (42%)	0.3
Supervision/ Mentorship/ Supportive Faculty	125 (29%)	44 (28%)	81 (30%)	0.6	65 (30%)	21 (30%)	39 (28%)	>0.9	35 (30%)	17 (22%)	18 (34%)	9 (18%)	15 (25%)	31 (43%)	0.029
Access to Equipment, Tools and Resources	104 (24%)	30 (19%)	74 (27%)	0.046	56 (26%)	16 (23%)	32 (23%)	0.8	27 (23%)	13 (17%)	16 (30%)	9 (18%)	15 (25%)	24 (33%)	0.2
Access to Networking Opportunities	89 (21%)	41 (26%)	48 (18%)	0.048	48 (22%)	12 (17%)	29 (21%)	0.7	23 (19%)	12 (16%)	9 (17%)	6 (12%)	12 (20%)	27 (38%)	0.006
Access to Existing Datasets	58 (14%)	20 (13%)	38 (14%)	0.7	37 (17%)	6 (8.5%)	15 (11%)	0.1	14 (12%)	10 (13%)	13 (25%)	7 (14%)	10 (17%)	4 (5.6%)	0.069
Ethical Approvals and Ethical Review Boards	51 (12%)	19 (12%)	32 (12%)	>0.9	20 (9.1%)	12 (17%)	19 (14%)	0.2	13 (11%)	11 (14%)	4 (7.5%)	5 (10%)	4 (6.7%)	14 (19%)	0.2
Enablers
Supervision/ Mentorship/ Supportive Faculty	274 (64%)	111 (70%)	16 (60%)	0.049	155 (71%)	46 (65%)	73 (53%)	0.002	85 (72%)	49 (64%)	32 (60%)	25 (51%)	34 (57%)	49 (68%)	0.11
Time Availability	121 (28%)	42 (26%)	79 (29%)	0.5	52 (24%)	25 (35%)	44 (32%)	0.1	37 (31%)	14 (18%)	18 (34%)	9 (18%)	20 (33%)	23 (32%)	0.11
Access to Research Skill Training	100 (23%)	35 (22%)	65 (24%)	0.6	54 (25%)	13 (18%)	33 (24%)	0.5	27 (23%)	18 (23%)	15 (28%)	4 (8.2%)	9 (15%)	27 (38%)	0.004
Access to Funding	96 (22%)	35 (22%)	61 (23%)	0.9	53 (24%)	9 (13%)	34 (24%)	0.1	25 (21%)	22 (29%)	10 (19%)	14 (29%)	12 (20%)	13 (18%)	0.5
Ethical Approvals and Ethical Review Boards	88 (21%)	31 (19%)	57 (21%)	0.7	42 (19%)	22 (31%)	24 (17%)	0.052	28 (24%)	22 (29%)	11 (21%)	4 (8.2%)	15 (25%)	8 (11%)	0.023
Access to Networking Opportunities	84 (20%)	22 (14%)	62 (23%)	0.021	43 (20%)	13 (18%)	28 (20%)	>0.9	20 (17%)	7 (9.1%)	10 (19%)	12 (24%)	7 (12%)	28 (39%)	<0.001
Access to Existing Datasets	79 (18%)	38 (24%)	41 (15%)	0.025	34 (16%)	16 (23%)	29 (21%)	0.3	17 (14%)	18 (23%)	10 (19%)	13 (27%)	11 (18%)	10 (14%)	0.3
Access to Equipment, Tools and Resources	77 (18%)	30 (19%)	47 (17%)	0.7	41 (19%)	18 (25%)	18 (13%)	0.078	24 (20%)	16 (21%)	8 (15%)	7 (14%)	4 (6.7%)	18 (25%)	0.1
*For continuous variables, a Kruskal-Wallis test was used, for categorical variables with cell counts greater or equal to five, a Chi Squared test was used, and for categorical variables with cell counts less than five, the Fisher’s Exact test was used to evaluate differences in characteristics between categories of respondents. Of note, p-values are not displayed where they could not be determin…
NW: North-West, NE: North-East, NC: North-Central, SW: South-West, SE: South-East, SS: South-South
