# Supplementary material for: A National Cross-Sectional Study of Research Opportunities and Barriers Among Medical Students in Nigeria
Source: Research Square preprint supplement (doi:10.21203/rs.3.rs-6230079/v1), 2025-04-21
Supplement: Supplementary file 1 [file a5565efa834ecc287a94d090.pdf]

# Research Opportunities and Barriers Among Recent Medical Graduates in Nigeria (Pilot)

## INFORMED CONSENT

I am Dr Paul Kingpriest, a research physician affiliated to the Surgical Equity and Research Hub, Jos. I am carrying out a survey on "Research Opportunities and Barriers Among Recent Medical Graduates in Nigeria". The aim of this study is to capture a comprehensive perspective and generate insights that can inform strategies to enhance research participation among this demographic.

Your insights will contribute to a better understanding of research experiences among recent medical graduates in Nigeria.

**This survey will take only about 5-10 minutes.**

Participation is free and voluntary, and refusal to participate will not infringe on participants' right. All responses are confidential and will be treated as such. No names or specific identifying information will be shared. Please email **onifaspaul@gmail.com** with any questions or concerns.

Kindly indicate your consent by continuing with the survey.

NB: This assessment focuses on research opportunities and barriers as at **time of graduation** and not necessarily your current opportunities and barriers.

Thank you!

\* Indicates required question

1. Email \*

---

## Demographic Information

2. Sex \*

*Mark only one oval.*☐ Male☐ Female

3. Medical School Graduation Year \*

 Dropdown*Mark only one oval.*☐ 2020☐ 2021☐ 2022☐ 2023

### Research Exposure

4. Did you actively participated in any research activities during your medical school education? \*

*Mark only one oval.*☐ Yes☐ No5. How many research projects in all did you **contribute** to while in medical school? \**Mark only one oval.*

0 1 2 3 4 5 6 7 8 9 10

☐ ☐ ☐ ☐ ☐ ☐ ☐ ☐ ☐ ☐ ☐

6. How many **group** research projects did you **contribute** to while in medical school? \*

*Mark only one oval.*

|                       |                       |                       |                       |                       |                       |                       |                       |                       |                       |                       |
|-----------------------|-----------------------|-----------------------|-----------------------|-----------------------|-----------------------|-----------------------|-----------------------|-----------------------|-----------------------|-----------------------|
| 0                     | 1                     | 2                     | 3                     | 4                     | 5                     | 6                     | 7                     | 8                     | 9                     | 10                    |
| <input type="radio"/> |

7. How many **individual** research projects did you **carry out** while in school? \*

*Mark only one oval.*

|                       |                       |                       |                       |                       |                       |
|-----------------------|-----------------------|-----------------------|-----------------------|-----------------------|-----------------------|
| 0                     | 1                     | 2                     | 3                     | 4                     | 5                     |
| <input type="radio"/> |

8. Which areas of research did you gain **proficiency** (confidence, competency and ability to teach others) at by virtual of your medical school education? (**Choose not more than three**) \*

*Check all that apply.*

- ☐ None
- ☐ Conceptualization (Idea formulation)
- ☐ Methodology (Development or design of methodology)
- ☐ Software (Programming, software development; designing computer programs; implementation of the computer code)
- ☐ Validation (Verification, whether as a part of the activity or separate, of the overall replication/ reproducibility of results/experiments and other research outputs)
- ☐ Formal analysis (Application of statistical, mathematical, computational, or other formal techniques to analyze or synthesize study data)
- ☐ Investigation (performing the experiments, or data/evidence collection)
- ☐ Resources (Provision of study materials, reagents, materials, patients, laboratory samples, animals, instrumentation)
- ☐ Data Curation (Management activities to annotate (produce metadata), scrub data and maintain research data (including software code,)
- ☐ Writing - Original Draft (specifically writing the initial draft)
- ☐ Writing - Review & Editing (critical review, commentary or revision – including pre-or postpublication stages)
- ☐ Visualization (Preparation, creation and/or presentation of the published work, specifically visualization/ data presentation)
- ☐ Project administration (Management and coordination responsibility for the research activity planning and execution)

9. Which aspects of research did you find **most difficult** to carry out during your medical education? (Choose not more than three) \*

*Check all that apply.*

- ☐ None
- ☐ Conceptualization (Ideas formulation)
- ☐ Methodology (Development or design of methodology)
- ☐ Software (Programming, software development; designing computer programs; implementation of the computer code)
- ☐ Validation (Verification, whether as a part of the activity or separate, of the overall replication/ reproducibility of results/experiments and other research outputs)
- ☐ Formal analysis (Application of statistical, mathematical, computational, or other formal techniques to analyze or synthesize study data)
- ☐ Investigation (performing the experiments, or data/evidence collection)
- ☐ Resources (Provision of study materials, reagents, materials, patients, laboratory samples, animals, instrumentation)
- ☐ Data Curation (Management activities to annotate (produce metadata), scrub data and maintain research data (including software code,)
- ☐ Writing - Original Draft (specifically writing the initial draft)
- ☐ Writing - Review & Editing (critical review, commentary or revision – including pre-or postpublication stages)
- ☐ Visualization (Preparation, creation and/or presentation of the published work, specifically visualization/ data presentation)
- ☐ Project administration (Management and coordination responsibility for the research activity planning and execution)

## Research Opportunities

10. Have you ever had the opportunity to present your research work at a conference? \*

*Mark only one oval.*

- ☐ Local (Within Nigeria)
- ☐ International (Outside Africa)
- ☐ Regional (Within Africa)
- ☐ None

11. What do you think has limited you from presenting?

---

12. Have you had the opportunity to **publish** any of your research works? \*

*Mark only one oval.*

- ☐ Local Journal
- ☐ International Journal
- ☐ None

13. What do you think limited you from publishing?

---

14. I was provided with **sufficient opportunities** for research during my medical school education \*

*Mark only one oval.*

- ☐ Strongly Agree
- ☐ Agree
- ☐ Neutral
- ☐ Disagree
- ☐ Strongly Disagree

15. What factors positively influenced your engagement in research activities? **(Select not more than three)** \*

*Check all that apply.*

- ☐ Time Constraint
- ☐ Supervision/Mentorship/Supportive Faculty
- ☐ Access to Funding
- ☐ Access to Equipment, Tools and Resources
- ☐ Ethical Approvals and Ethical Review Boards
- ☐ Access to Research Skill Training
- ☐ Access to existing datasets
- ☐ Access to networking opportunities

16. If **others** please specify

**Barriers To Research**

17. What were the greatest barriers to involvement in research during your medical education? **(Choose not more than three)** \*

*Check all that apply.*

- ☐ Time Constraint
- ☐ Supervision/Mentorship/Supportive Faculty
- ☐ Access to Funding
- ☐ Access to Equipment, Tools and Resources
- ☐ Ethical Approvals and Ethical Review Boards
- ☐ Access to Research Skill Training
- ☐ Access to existing datasets
- ☐ Access to networking opportunities

18. Other(s) Please specify

---

19. **Future Perspectives** \*

I believe that incorporating more research opportunities into the medical school curriculum is essential for medical education

*Mark only one oval.*

- ☐ Strongly agree
- ☐ Agree
- ☐ Neutral
- ☐ Disagree
- ☐ Strongly disagree



**20. Recommendations**

\*

What specific changes or improvements would you suggest to enhance research opportunities for medical students in Nigeria?

---

---

---

---

---

**Conclusion**

Thank you for completing the survey. Your input is valuable for enhancing research opportunities for recent medical graduates in Nigeria. If you have any additional comments or concern please reachout to onifaspaul@gmail.com

---

This content is neither created nor endorsed by Google.

Google Forms
